# Supplementary material for: Hedgehog interacting protein–expressing lung fibroblasts suppress lymphocytic inflammation in mice
Source: JCI Insight. 2021 Sep 8;6(17):e144575. doi: 10.1172/jci.insight.144575 (PMC8492352; doi:10.1172/jci.insight.144575)
Supplement: Supplemental data [file jciinsight-6-144575-s122.pdf]

# Hedgehog interacting protein-expressing lung fibroblasts suppress lymphocytic inflammation in mice

Jeong H. Yun<sup>1,2\*</sup>, ChangHee Lee<sup>3\*</sup>, Tao Liu<sup>1</sup>, Siqi Liu<sup>1</sup>, Edy Kim<sup>2</sup>, Shuang Xu<sup>1</sup>, Jeffrey L. Curtis<sup>4,5</sup>, Luca Pinello<sup>6</sup>, Russel P. Bowler<sup>7</sup>, Edwin K. Silverman<sup>1</sup>, Craig P. Hersh<sup>1,2</sup>, Xiaobo Zhou<sup>1</sup>

## SUPPLEMENTARY MATERIALS

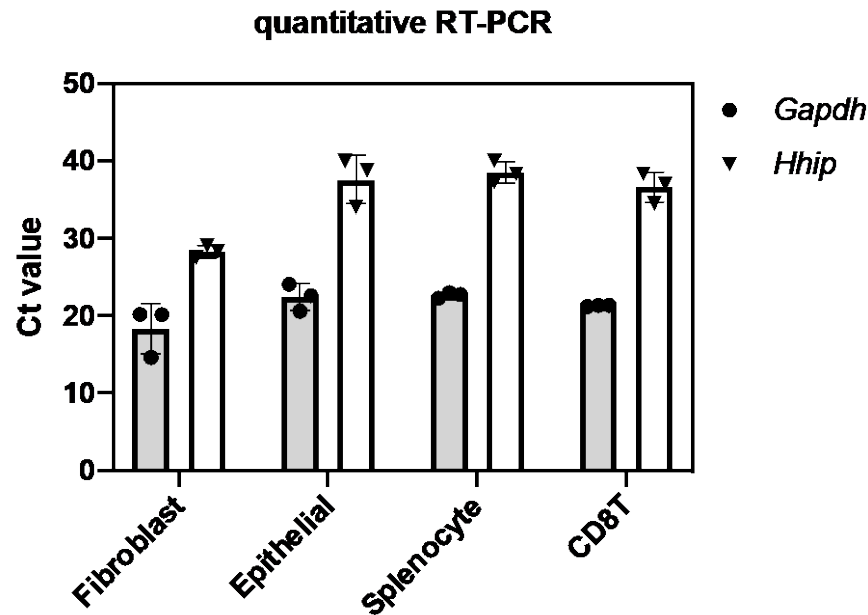

**Figure S1.** Cycle threshold (Ct) values of *Hhip* and housekeeping gene (*Gapdh*) from real-time PCR in various lung cell types. Each cell type was isolated by cell culture and magnetic-activated cell sorting (fibroblasts, alveolar epithelial cells and CD8+T cells) and spleen samples are from single cell suspension generated by mechanical disruption of the spleen from 4-month-old wild type C57BL6 mice (n=3). Data are represented as mean  $\pm$  SD. Each point represents individual biologic replicate. Fibroblast: lung fibroblast, Epithelial: alveolar type 2 cells, CD8T: lung CD8+T cells

| Genotype | Age | Rep | Sequencer  | Platform | Estimated Number of Cells | Median Genes per Cell | Mean Reads per Cell | Median UMI per Cell | Valid Barcodes (%) | Reads Mapped Confidently to Exons (%) | Fraction Reads in Cells (%) | Total Genes Detected | Total number of cells analyzed |
|----------|-----|-----|------------|----------|---------------------------|-----------------------|---------------------|---------------------|--------------------|---------------------------------------|-----------------------------|----------------------|--------------------------------|
| Het      | P15 | 1   | HiSeq      | 10x      | 1,260                     | 564                   | 53,248              | 1,235               | 95.20%             | 50.80%                                | 86.1%                       | 14,638               | 1,206                          |
| Het      | P15 | 2   | HiSeq      | 10x      | 377                       | 930                   | 182,825             | 2,356               | 96.30%             | 48.20%                                | 86.0%                       | 14,169               | 341                            |
| Het      | 4m  | 1   | HiSeq      | 10x      | 3,004                     | 1,060                 | 33,802              | 2,521               | 98.30%             | 70.40%                                | 91.7%                       | 16,863               | 2,976                          |
| Het      | 4m  | 2   | HiSeq      | 10x      | 5,107                     | 1,081                 | 17,650              | 2,567               | 98.30%             | 70.90%                                | 93.9%                       | 17,491               | 5,055                          |
| Het      | 4m  | 3   | NovaSeq    | 10x      | 4,177                     | 706                   | 58,018              | 1,293               | 97.2%              | 61.3%                                 | 88.3%                       | 16,400               | 4,160                          |
| Het      | 8m  | 1   | NextSeq500 | inDrops  | 1,119                     | 426                   | 5,330               | 883                 | 44.00%             | 59.57%                                | 19.2%                       | 14,591               | 653                            |
| Het      | 8m  | 2   | NextSeq500 | inDrops  | 2,339                     | 440                   | 4,347               | 886                 | 46.65%             | 59.35%                                | 33.4%                       | 15,465               | 899                            |
| Het      | 8m  | 3   | NovaSeq    | 10x      | 6,612                     | 825                   | 121,309             | 1,648               | 97.2%              | 58.5%                                 | 88.2%                       | 17,597               | 6,022                          |
| Het      | 11m | 1   | HiSeq      | 10x      | 2,315                     | 1,142                 | 20,826              | 2,623               | 98.30%             | 64.70%                                | 92.1%                       | 16,681               | 2,316                          |
| Het      | 11m | 2   | HiSeq      | 10x      | 3,362                     | 1,013                 | 28,663              | 2,275               | 98.20%             | 70.70%                                | 92.0%                       | 17,071               | 3,324                          |
| Wt       | P15 | 1   | HiSeq      | 10x      | 1,233                     | 776                   | 50,224              | 1,780               | 96.70%             | 51.10%                                | 85.4%                       | 14,738               | 1,142                          |
| Wt       | P15 | 2   | HiSeq      | 10x      | 1,054                     | 706                   | 75,251              | 1,542               | 96.50%             | 47.10%                                | 81.8%                       | 14,532               | 930                            |
| Wt       | 4m  | 1   | HiSeq      | 10x      | 2,721                     | 967                   | 38,510              | 2,137               | 98.20%             | 67.50%                                | 90.5%                       | 16,522               | 2,701                          |
| Wt       | 4m  | 2   | NovaSeq    | 10x      | 1,981                     | 847                   | 336,477             | 1,850               | 97.5%              | 62.9%                                 | 91.9%                       | 15,558               | 1,943                          |
| Wt       | 8m  | 1   | NextSeq500 | inDrops  | 467                       | 490                   | 7,378               | 1,067               | 39.17%             | 60.79%                                | 16.1%                       | 12,870               | 311                            |
| Wt       | 8m  | 2   | NextSeq500 | inDrops  | 2,968                     | 349                   | 3,213               | 794.5               | 45.83%             | 66.53%                                | 36.9%                       | 14,774               | 824                            |
| Wt       | 11m | 1   | HiSeq      | 10x      | 1,678                     | 1,120                 | 26,650              | 2,644               | 98.30%             | 68.80%                                | 92.7%                       | 16,320               | 1,639                          |
| Wt       | 11m | 2   | HiSeq      | 10x      | 2,552                     | 1,132                 | 47,514              | 2,688               | 98.10%             | 69.70%                                | 92.4%                       | 16,941               | 2,510                          |

**Table S1.** Sequencing Quality Control Metrics Summary of lung samples used in the single cell RNA-seq experiment.

Rep: replicate, p15: postnatal day 15, 4m: 4 months, 8m: 8 months, 11m: 11months, Het: *Hhip*<sup>+/-</sup>, Wt: *Hhip*<sup>+/+</sup>

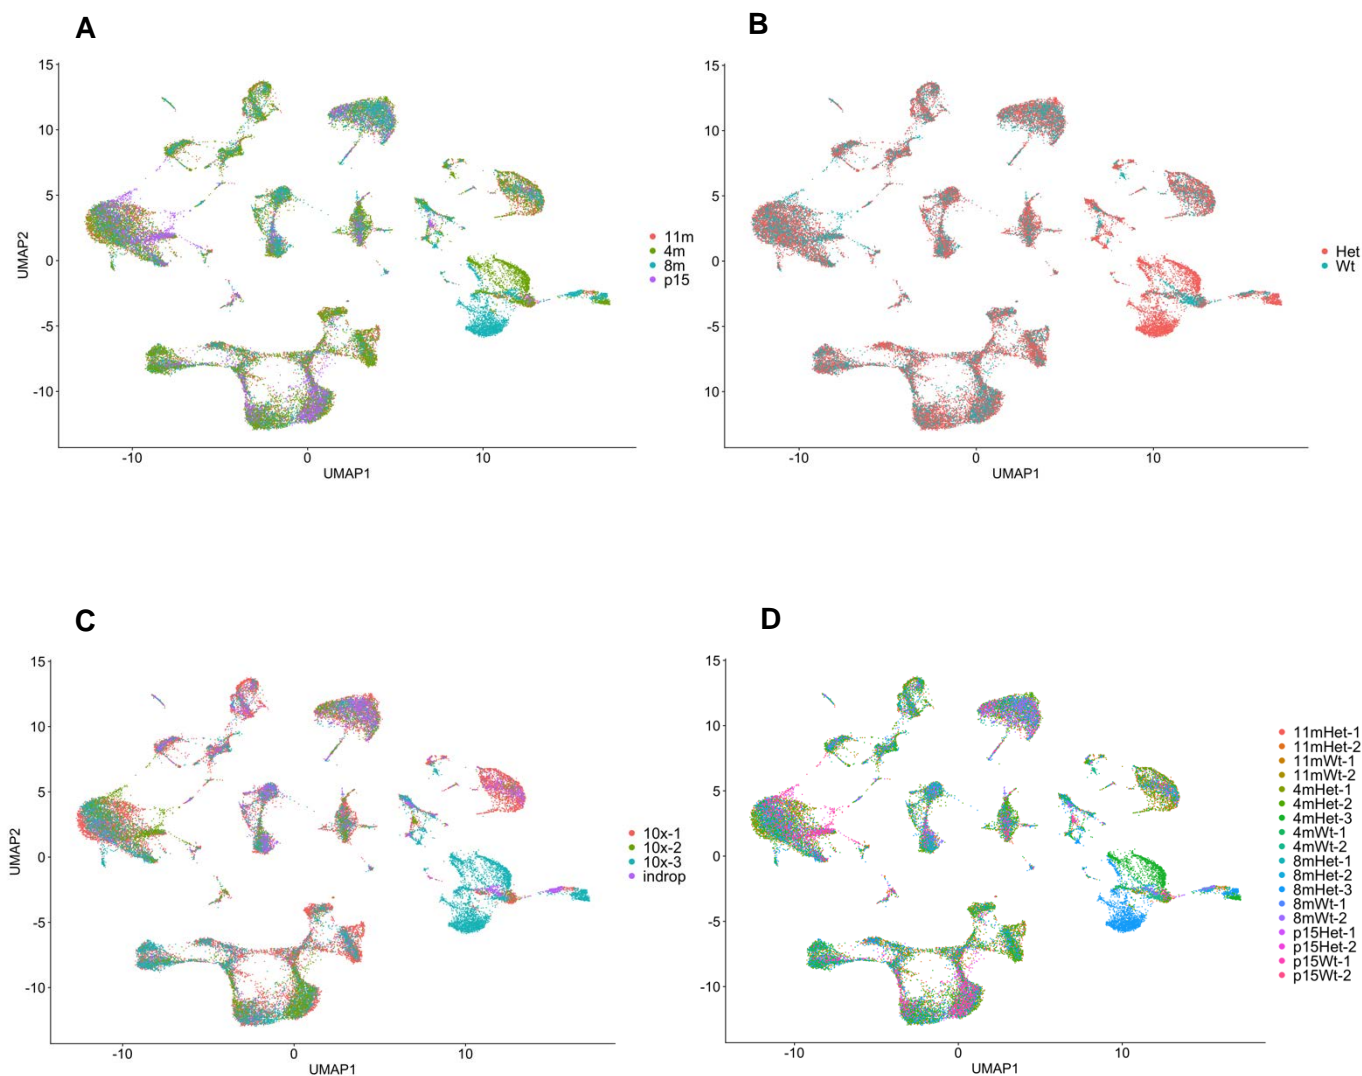

**Figure S2.** Uniform manifold approximation and projection (UMAP) visualization of single cell RNA sequencing of 38,875 cells. Cells were indicated by various colors based on (A) the originating age of the samples, (B) genotypes, (C) the technical batches, (D) individual libraries. 10x-3 batch was enriched for non-CD45 cells, including fibroblast and endothelial population. Cell clusters were not altered by age, *Hhip* haploinsufficiency or batch effects.

p15: postnatal day 15, 4m: 4 months, 8m: 8 months, 11m: 11months, Het: *Hhip*<sup>+/-</sup>, Wt: *Hhip*<sup>+/+</sup>

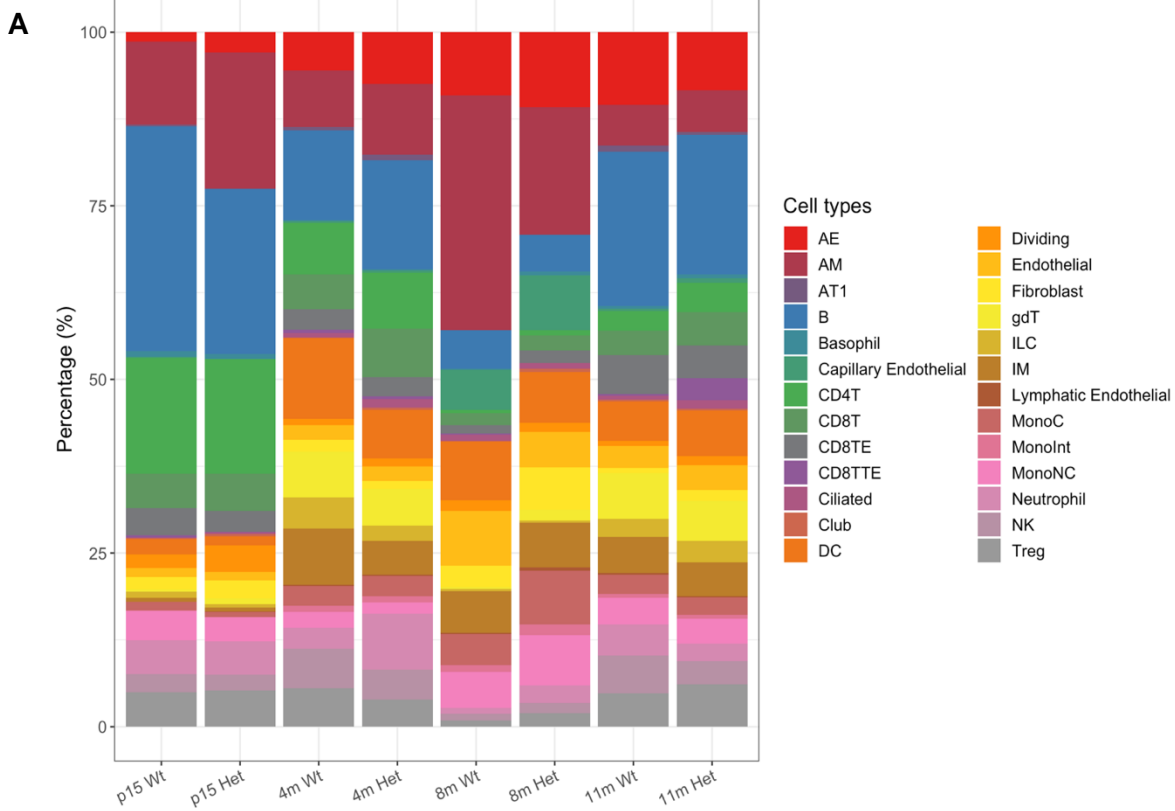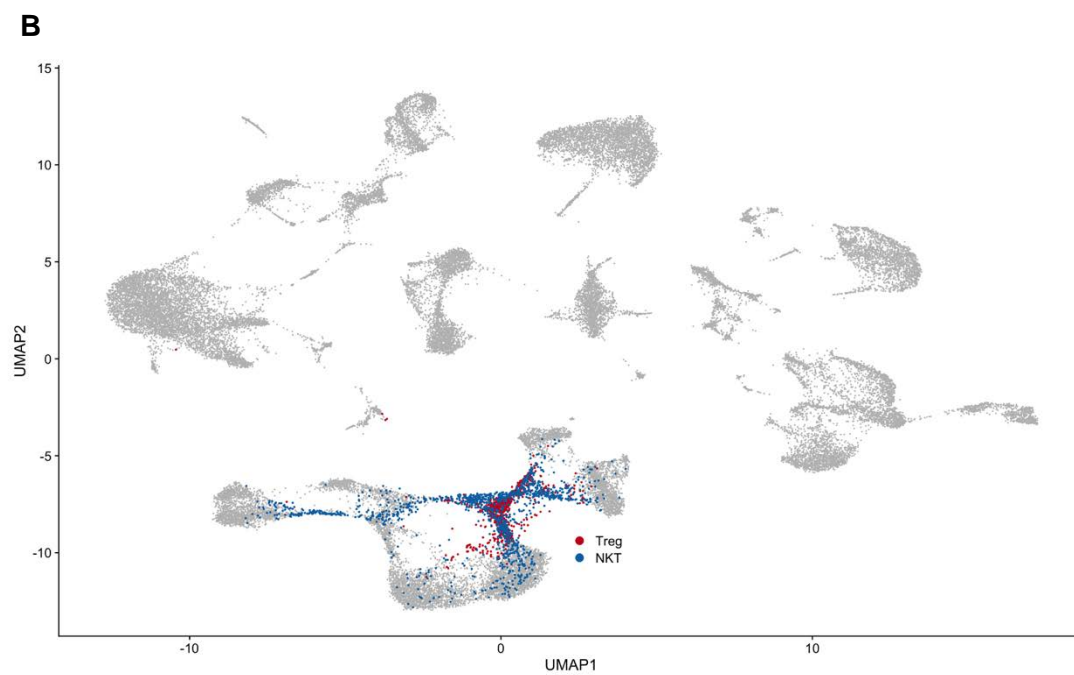

C

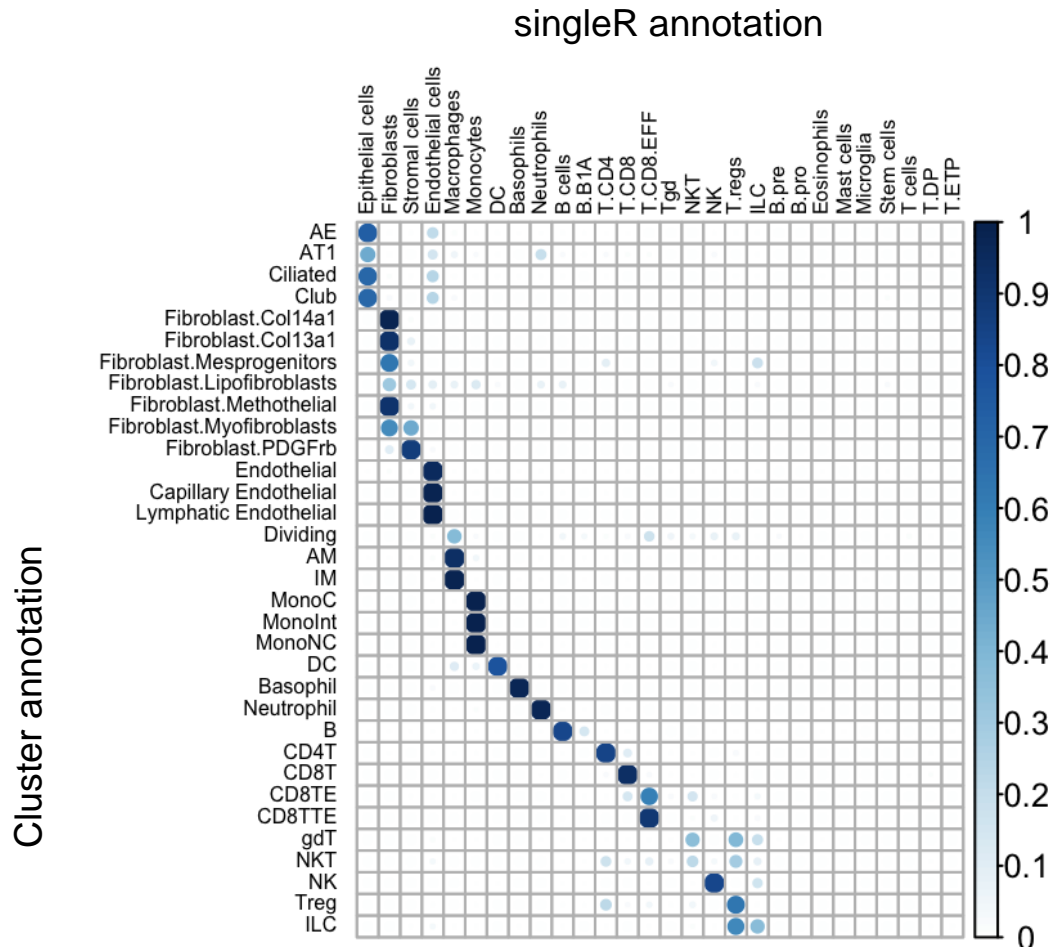

**Figure S3.** Cell type annotation in single cell RNA sequencing data. (A) Percentage of cells of each cell type at p15, 4 months, 8 months and 11 months of age. Samples in 10x batch 3 enriched for CD45 negative population were excluded for this analysis. Single cell RNA-sequencing was performed in different technical platform (inDrops) for 8 months samples with smaller cell numbers, suggesting technical bias affecting cellular proportions. (B) Annotation of natural killer T (NKT) cells. NKT cells (Blue) were grouped within the regulatory T cells (Treg, Red) based on graph-based clustering. (C) Dot plot comparing annotation of graph-based clusters and manual annotation of NKT cells (Cluster annotation) with annotation of cell types based on singleR program based on ImmGen data (singleR annotation)(1)

p15: postnatal day 15, 4m: 4 months, 8m: 8 months, 11m: 11 months, Wt: *Hhip*<sup>+/-</sup>, Het: *Hhip*<sup>+/-</sup>  
 AE: alveolar epithelial cell, AM: alveolar macrophage, AT1: type 1 alveolar epithelial cell, CD8T: CD8+T cell, CD8TE: CD8+effector memory T cell, CD8TTE: CD8+terminal effector T cell, DC: dendritic cell, gdT: gamma delta T cell, ILC: innate lymphoid cell, IM: interstitial macrophage, MonoC: classical monocyte, MonoInt: intermediate monocyte, MonoNC: non-classical monocyte, NK: natural killer

**A**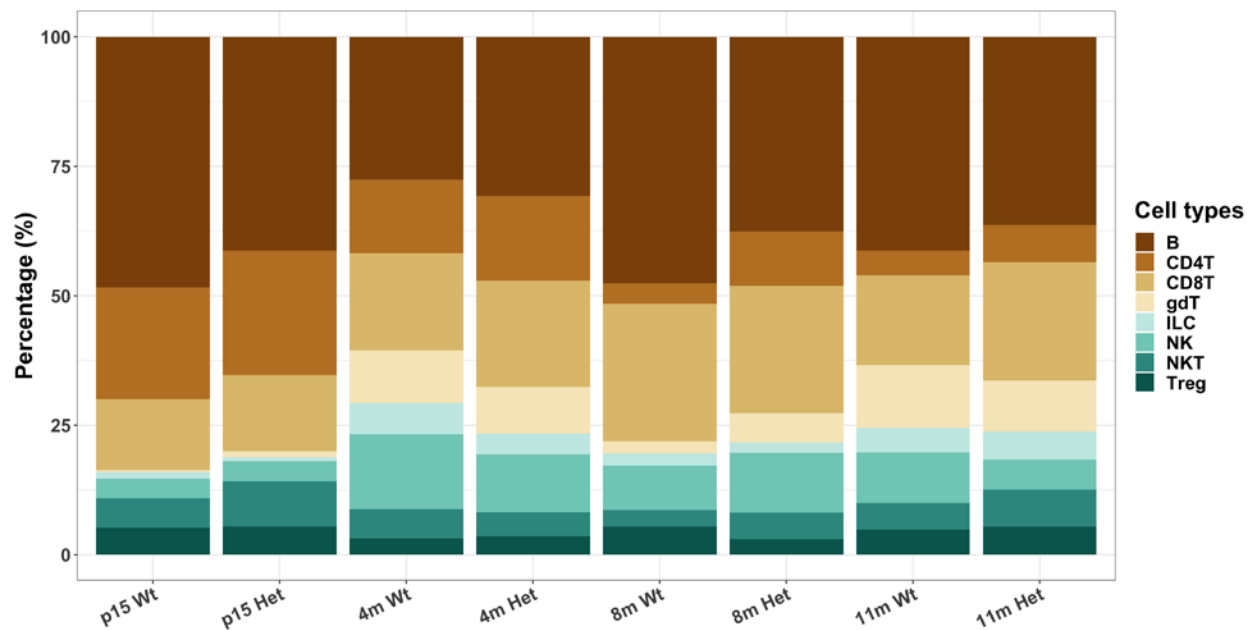**B**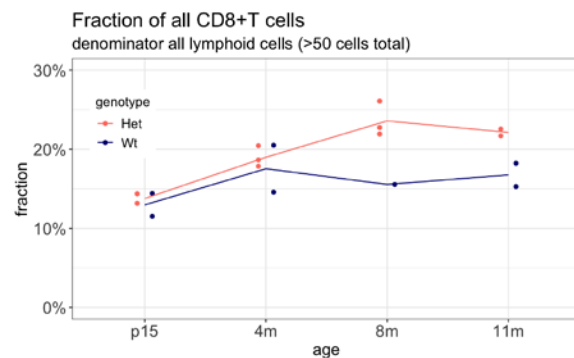**C**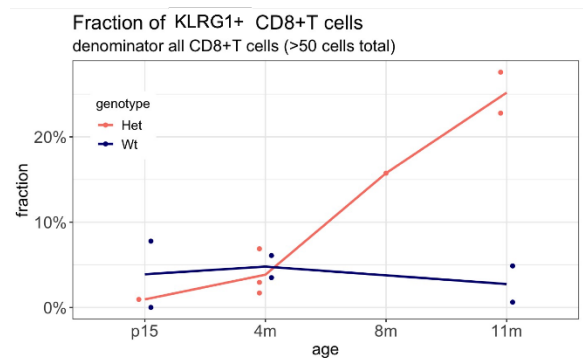

**Figure S4.** Relative proportion of lymphoid cells in murine lungs as determined by single cell RNA-sequencing data. (A) Fraction of CD4+T cells in lymphoid cells decrease with age in both genotypes. Fraction of gamma delta T cells, innate lymphoid cells, natural killer T cells and natural killer cells among lymphoid cells do not significantly change with age. Combined proportion of CD8+ cells are shown. (B) Fraction of Cd8+T cells among lymphoid cells increases from p15 to 8 months of age and remain elevated in lungs from *Hhip*<sup>+/-</sup> mice. (C) percentage of Klr1+terminal effector CD8+T cells among CD8+T cells increases markedly from 4 months to 11 months of age in lungs from *Hhip*<sup>+/-</sup> mice. Each dot represents one mouse selected with greater than 50 CD8+T cells.

B: B cells, CD4T: CD4+ T cells, CD8T: All CD8+ cells, gdT: gamma delta T cells, ILC: innate lymphoid cells, NK: natural killer cells, NKT: natural killer T cells, Treg: regulatory T cells, Wt: *Hhip*<sup>+/+</sup>, Het: *Hhip*<sup>+/-</sup> mice.

**A**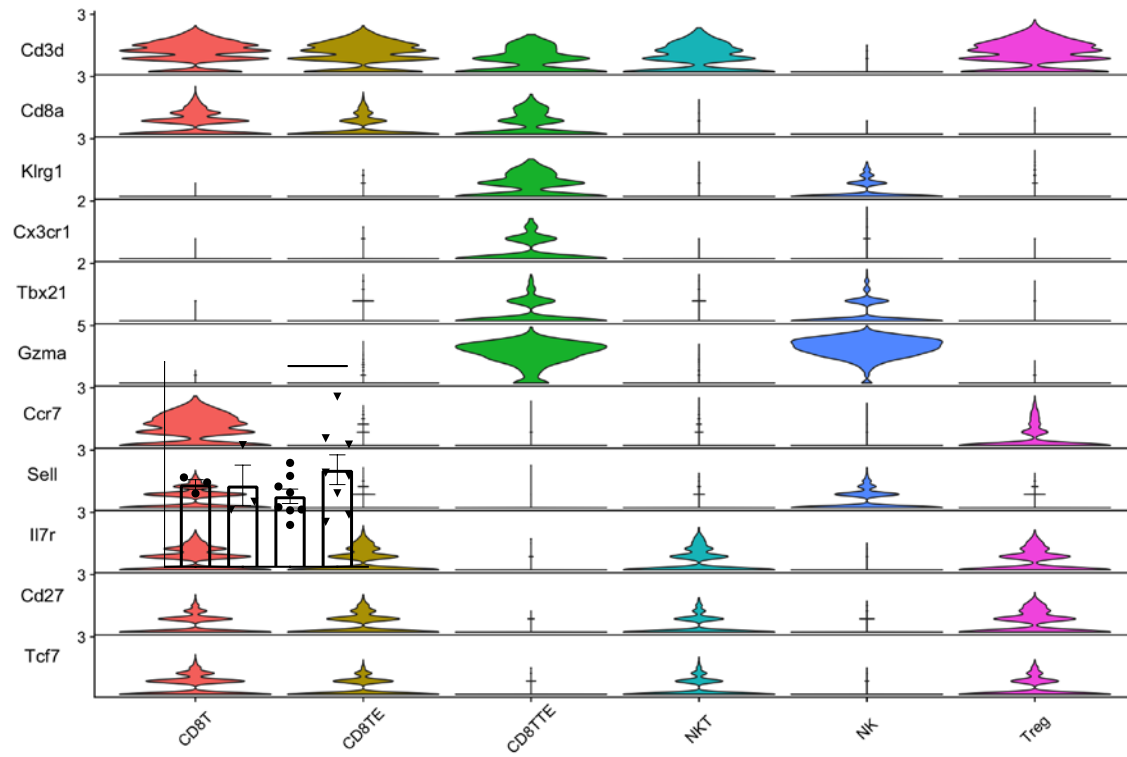**B**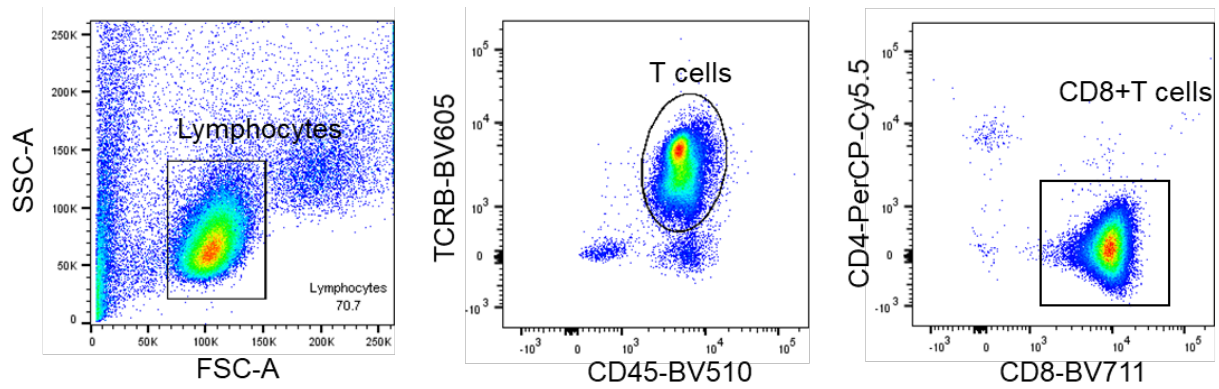**C**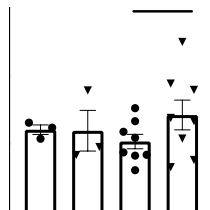

**Figure S5.** Expression of T cell markers in T cell subsets and FACS gating strategy. (A) Violin plot showing expression of genes in T cell subtypes from *Hhip*<sup>+/-</sup> and *Hhip*<sup>+/+</sup> mice combined. Effector markers (Klrg1, Cx3cr1, Tbx21, Gzma) are expressed in CD8 terminal effector cells and NK cells, while memory markers (Ccr7, Sell(CD62L), Il7r, Cd27, Tcf27) are expressed in naïve CD8+T cells, effector memory CD8+ T cells and regulatory T cells. NK cells lack expression of T cell marker Cd3d and Cd8a. (B) Representative FACS gating strategy for CD8+T cells analyzed in the main Figure XX. (C) Geometric mean of KLRG1 fluorescence intensity analyzed by FACS in the main Figure XX from *Hhip*<sup>+/-</sup> and *Hhip*<sup>+/+</sup> mice (N=3-8 mice/group). Means $\pm$  SD are shown. Wilcoxon matched pairs signed rank test. CD8T: CD8+T cell (naïve), CD8TE: CD8+effector memory T cell, CD8TTE: CD8+terminal effector cell, NKT: natural killer T cell, NK: natural killer cell, T reg: regulatory T cell.

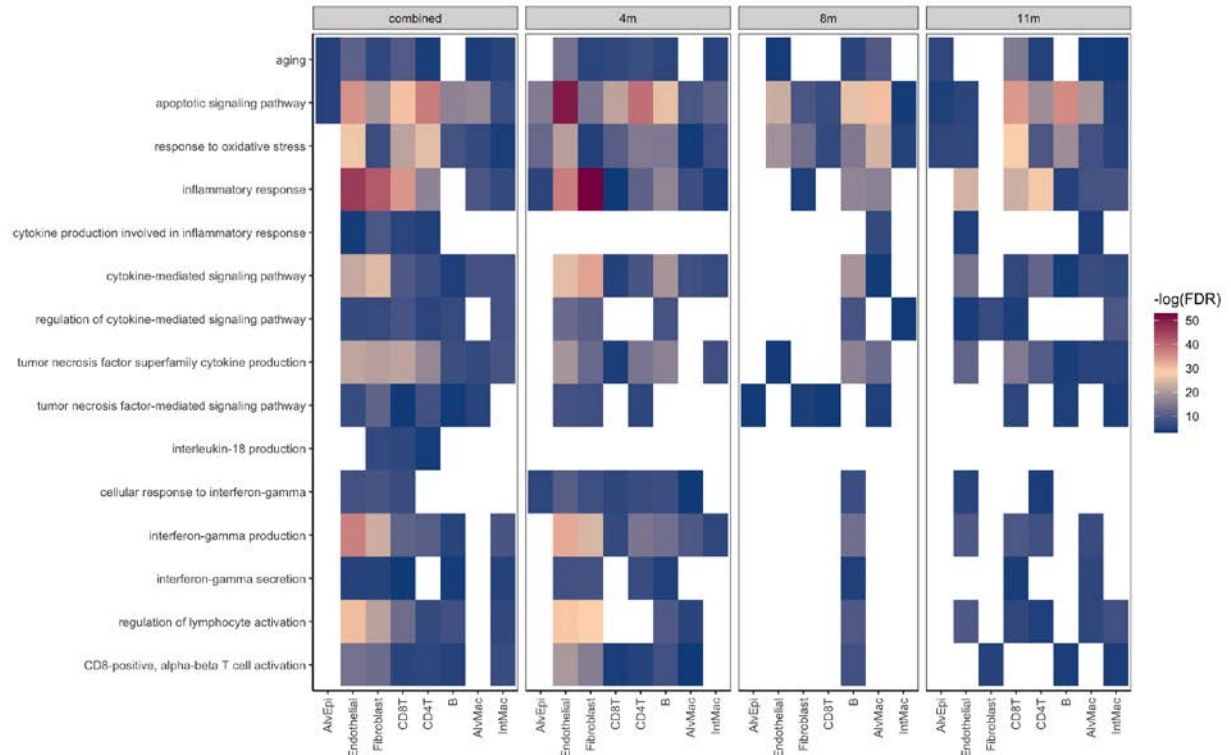

**Figure S6.** Enrichment of GO: biologic process pathways in upregulated genes in *Hhip* haploinsufficient mice compared to wild type littermate mice identified by g:Profiler(2). Cell type-specific upregulated genes from *Hhip*<sup>+/-</sup> mice are enriched for common inflammatory pathways including cytokine mediated signaling pathway, interleukin-18-mediated signaling pathway, interferon-gamma, tumor necrosis factor-mediated signaling pathway. FDR: false discovery rate, AlvEpi: alveolar epithelial cells, CD8T: all CD8+ cells, AlvMac: alveolar macrophages, IntMac: interstitial macrophages.

A

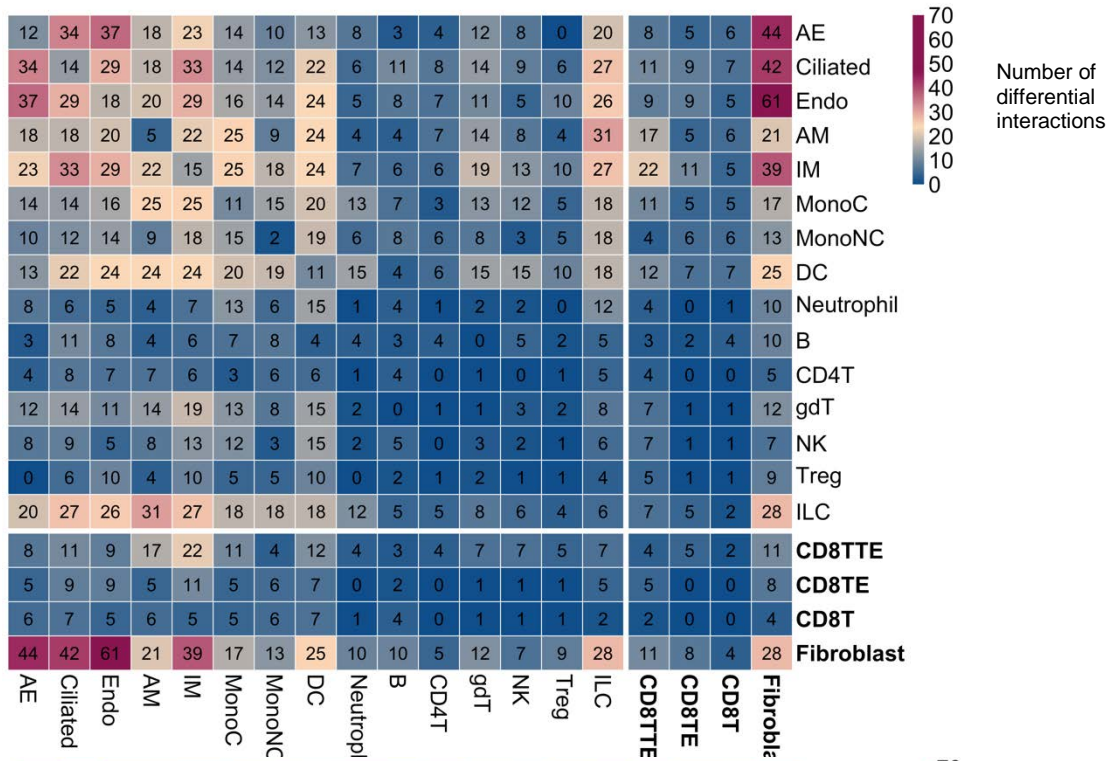

B

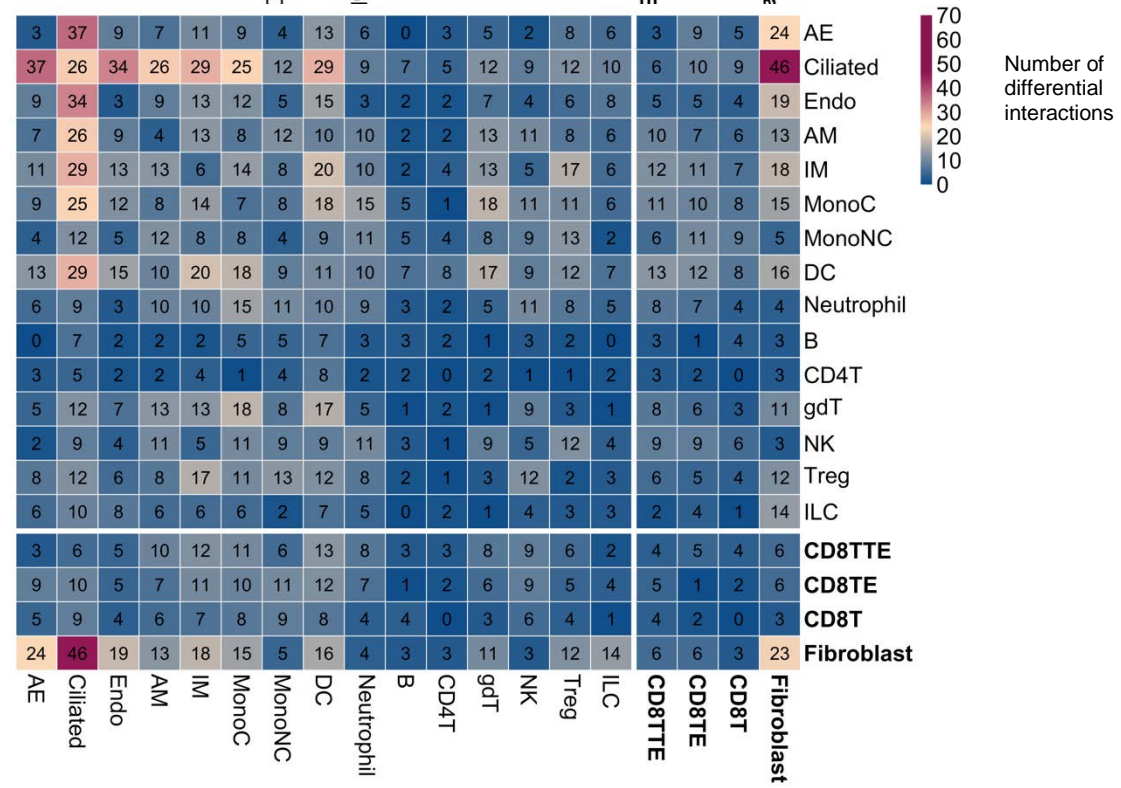

C

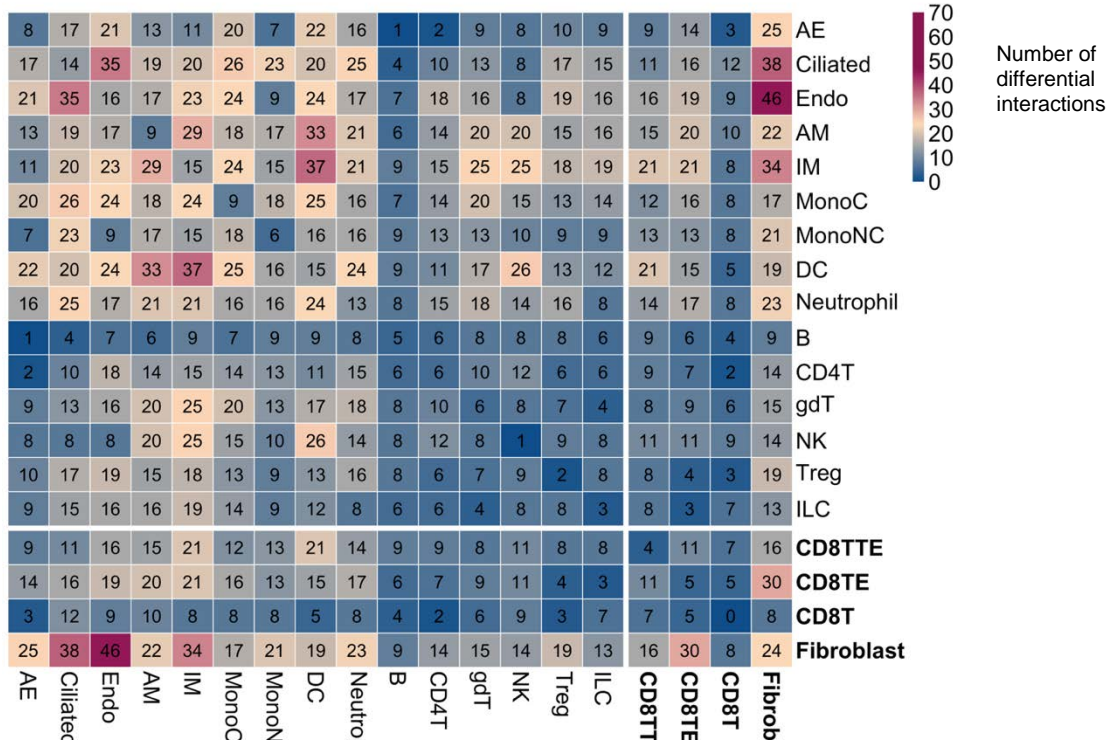

D

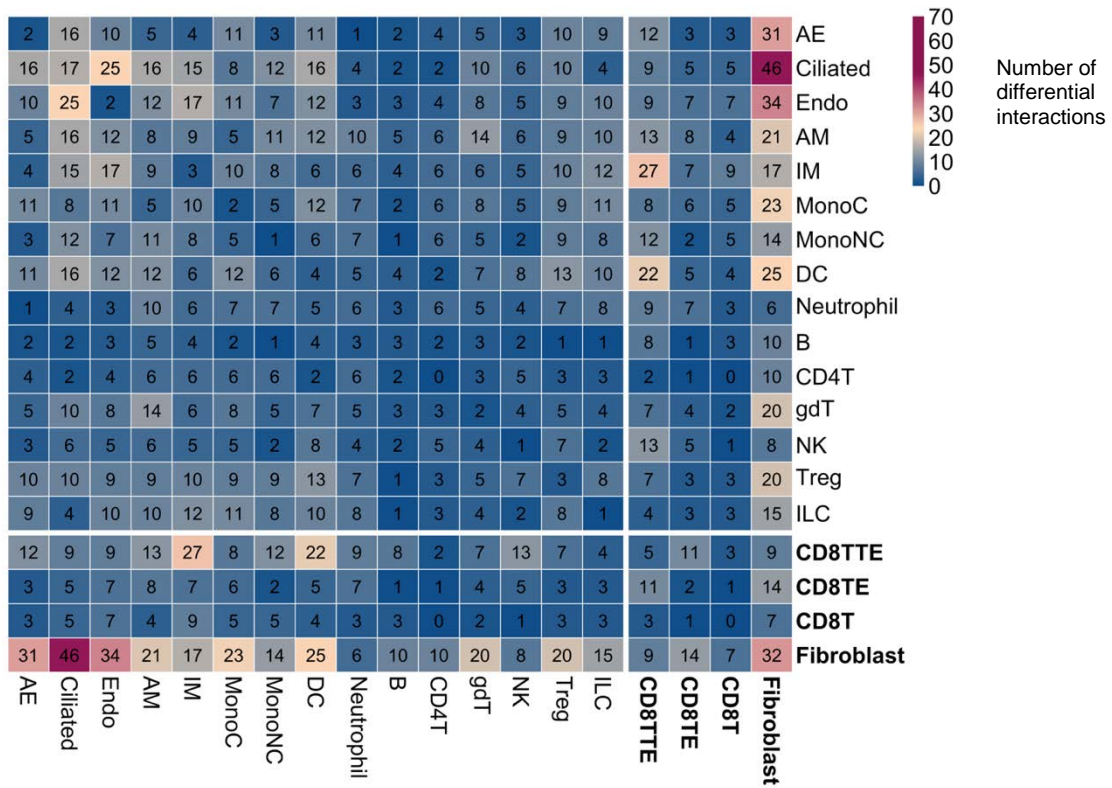

**Figure S7.** Differential receptor-ligand pair interactions analysis by genotype across different cell types in a given age. The number of alveolar type 1 cells, capillary endothelial and intermediate monocytes in p15 samples and the number of lymphatic endothelial cells, club cells, and basophils across all age points were too small to be included for receptor-ligand interaction analysis. (A) p15 samples, (B) 4-month samples, (C) 8-month samples, (D) 11-month samples. The number inside each block indicates number of different receptor-ligand pairs in *Hhip*<sup>+/-</sup> compared to *Hhip*<sup>+/+</sup>; Scale bar indicates number of receptor-ligand pairs. AE: alveolar epithelial cell, Endo: endothelial cell, AM: alveolar macrophage, IM: interstitial macrophage, MonoC: classical monocyte, MonoNC: non-classical monocyte, DC: dendritic cell, B: B cell, gdT: gamma delta T cell, NK: natural killer cell, Treg: regulatory T cell, ILC: innate lymphoid cell, CD8TE: CD8<sup>+</sup> effector memory T cell, CD8TTE: CD8<sup>+</sup> terminal effector T cell.

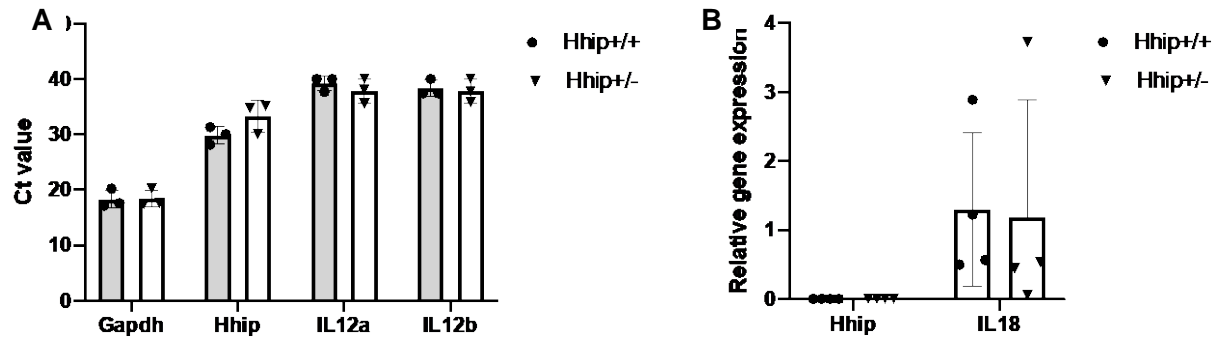

**Figure S8.** Expression of specific genes by cell type. (A) Cycle threshold (Ct) values of a housekeeping gene (*Gapdh*), *Hhip*, *Il12a* and *Il12b* from real-time PCR measured in lung fibroblasts. Lung fibroblasts were isolated from *Hhip*<sup>+/+</sup> and *Hhip*<sup>+/-</sup> mice (n=3 each). (B) *Il18* expression in alveolar macrophages measured by qPCR from *Hhip*<sup>+/+</sup> and *Hhip*<sup>+/-</sup> mice. Expression of *Hhip* is not detectable in alveolar macrophages, compared to reference gene *TBP*. IL-18 expression is not different between *Hhip*<sup>+/+</sup> and *Hhip*<sup>+/-</sup> mice (n= 4 each). A-B: Data are represented as means  $\pm$  SD. Each point represents individual biological replicate.

### **Online supplementary files**

Supplementary File 1 lists marker genes specific to individual cell clusters and fibroblast subclusters.

Supplementary File 2 lists differentially expressed genes by genotype combining all age points (combined), and by individual age points.

### **Supplementary Reference**

1. Aran D et al. Reference-based analysis of lung single-cell sequencing reveals a transitional profibrotic macrophage. *Nat. Immunol.* 2019;20(2):163–172.
2. Raudvere U et al. g:Profiler: a web server for functional enrichment analysis and conversions of gene lists (2019 update). *Nucleic Acids Res.* 2019;47(W1):W191–W198.
